# Supplementary material for: The use of high resolution melting analysis of ITS-1 for rapid differentiation of parasitic nematodes Haemonchus contortus and Ashworthius sidemi
Source: PubMed Central journal article supplement (PMC7525508; doi:10.1038/s41598-020-73037-9), 2020-09-29
Supplement: 41598_2020_73037_MOESM1_ESM.pdf [file 41598_2020_73037_MOESM1_ESM.pdf]

# **The Use of High Resolution Melting Analysis of *ITS-1* for Rapid Differentiation of Parasitic Nematodes *Haemonchus contortus* and *Ashworthius sidemi***

Lucie Skorpikova<sup>1,\*</sup>, Nikol Reslova<sup>1</sup>, Jan Magdalek<sup>2</sup>, Jaroslav Vadlejch<sup>2</sup> & Martin Kasny<sup>1</sup>

<sup>1</sup>Department of Botany and Zoology, Faculty of Science, Masaryk University, Brno, 611 37, Czech Republic

<sup>2</sup>Department of Zoology and Fisheries, Faculty of Agrobiological Sciences, Food and Natural Resources, Czech University of Life Sciences Prague, Prague, 165 00, Czech Republic

\*skorpikovaLucie@seznam.cz

**Table S1:** Dominant distinguishing characters of *A. sidemi* males used in the present study.

| <b>ID</b> | <b>Body length<br/>(mm)</b> | <b>Oesophagus<br/>length (mm)</b> | <b>Maximal<br/>oesophagus<br/>width (mm)</b> | <b>Bursa<br/>copulatrix<br/>length (mm)</b> | <b>Gubernaculum</b> | <b>Spicules<br/>length<br/>(mm)*</b> |
|-----------|-----------------------------|-----------------------------------|----------------------------------------------|---------------------------------------------|---------------------|--------------------------------------|
| 1M        | 19.3                        | 1.8                               | 0.279                                        | 0.547                                       | —                   | 0.760                                |
| 2M        | 14.2                        | 1.6                               | 0.322                                        | 0.472                                       | —                   | 0.808                                |
| 3M        | 14.6                        | 1.4                               | 0.249                                        | 0.408                                       | —                   | 0.816                                |
| 4M        | 15.4                        | 1.5                               | 0.253                                        | 0.503                                       | —                   | 0.766                                |
| 5M        | 16.1                        | 1.6                               | 0.242                                        | 0.465                                       | —                   | 0.809                                |
| 6M        | 13.4                        | 1.5                               | 0.252                                        | 0.600                                       | —                   | 0.826                                |
| 7M        | 26.1                        | 1.9                               | 0.249                                        | 1.250                                       | —                   | 0.809                                |
| 8M        | 25.7                        | 1.9                               | 0.246                                        | 1.060                                       | —                   | 0.808                                |
| 9M        | 25.1                        | 1.9                               | 0.321                                        | 1.256                                       | —                   | 0.775                                |
| 10M       | 14.6                        | 1.4                               | 0.296                                        | 0.408                                       | —                   | 0.816                                |

\* Specific identification character

**Table S2** Dominant distinguishing characters of *H. contortus* males used in the present study.

| <b>ID</b> | <b>Body length<br/>(mm)</b> | <b>Oesophagus<br/>length (mm)</b> | <b>Oesophagus<br/>length (%)</b> | <b>Gubernaculum<br/>length (mm)</b> | <b>Spicules<br/>length (mm) *</b> | <b>Spicule barb<br/>length -<br/>right/left (mm)</b> |
|-----------|-----------------------------|-----------------------------------|----------------------------------|-------------------------------------|-----------------------------------|------------------------------------------------------|
| 11M       | 16.4                        | 1.5                               | 8.9                              | 0.214                               | 0.429                             | 0.042/0.024                                          |
| 12M       | 13.9                        | 1.2                               | 8.9                              | 0.195                               | 0.391                             | 0.038/0.021                                          |
| 13M       | 13.3                        | 1.3                               | 9.8                              | 0.202                               | 0.407                             | 0.042/0.022                                          |
| 14M       | 13.8                        | 1.3                               | 9.2                              | 0.240                               | 0.420                             | 0.045/0.024                                          |
| 15M       | 13.8                        | 1.2                               | 8.9                              | 0.232                               | 0.464                             | 0.048/0.027                                          |
| 16M       | 13.8                        | 1.3                               | 9.7                              | 0.224                               | 0.435                             | 0.043/0.022                                          |
| 17M       | 11.8                        | 1.3                               | 10.8                             | 0.216                               | 0.418                             | 0.039/0.022                                          |
| 18M       | 15.5                        | 1.4                               | 8.8                              | 0.228                               | 0.476                             | 0.042/0.024                                          |
| 19M       | 13.7                        | 1.4                               | 10.2                             | 0.238                               | 0.468                             | 0.045/0.024                                          |
| 20M       | 12.7                        | 1.2                               | 9.8                              | 0.231                               | 0.463                             | 0.043/0.021                                          |

\* Specific identification character

**Table S3:** Dominant distinguishing characters of *A. sidemi* females used in the present study.

| <b>ID</b> | <b>Body length<br/>(mm)</b> | <b>Oesophagus<br/>length (mm)</b> | <b>Maximal<br/>oesophagus<br/>width (mm)</b> | <b>Shape of<br/>vulvar flap</b> | <b>Distance of vulva<br/>from posterior<br/>end (mm)</b> | <b>Distance of anus<br/>from posterior<br/>end (mm)</b> |
|-----------|-----------------------------|-----------------------------------|----------------------------------------------|---------------------------------|----------------------------------------------------------|---------------------------------------------------------|
| 1F        | 18.4                        | 0.170                             | 1.6                                          | linguiform                      | 2.348                                                    | 0.496                                                   |
| 2F        | 17.7                        | 0.144                             | 1.6                                          | knopped                         | 2.093                                                    | 0.513                                                   |
| 3F        | 35.0                        | 0.244                             | 2.0                                          | linguiform                      | 4.480                                                    | 0.573                                                   |
| 4F        | 37.4                        | 0.200                             | 2.0                                          | linguiform                      | 4.437                                                    | 0.562                                                   |
| 5F        | 18.4                        | 0.133                             | 1.8                                          | linguiform                      | 2.100                                                    | 0.476                                                   |
| 6F        | 18.4                        | 0.189                             | 1.7                                          | linguiform                      | 2.170                                                    | 0.498                                                   |
| 7F        | 19.2                        | 0.170                             | 1.7                                          | knopped                         | 2.321                                                    | 0.527                                                   |
| 8F        | 17.3                        | 0.163                             | 1.5                                          | knopped                         | 2.179                                                    | 0.510                                                   |
| 9F        | 30.4                        | 0.201                             | 1.8                                          | linguiform                      | 4.883                                                    | 0.569                                                   |
| 10F       | 39.3                        | 0.183                             | 1.9                                          | linguiform                      | 4.538                                                    | 0.573                                                   |
| 11F       | 32.6                        | 0.204                             | 1.9                                          | smooth                          | 4.224                                                    | 0.697                                                   |
| 12F       | 34.6                        | 0.235                             | 1.8                                          | linguiform                      | 4.356                                                    | 0.510                                                   |
| 13F       | 17.5                        | 0.198                             | 1.7                                          | linguiform                      | 2.265                                                    | 0.505                                                   |
| 14F       | 17.4                        | 0.175                             | 1.5                                          | linguiform                      | 2.312                                                    | 0.583                                                   |
| 15F       | 16.2                        | 0.182                             | 1.5                                          | linguiform                      | 2.098                                                    | 0.551                                                   |

**Table S4:** Dominant distinguishing characters of *H. contortus* females used in the present study.

| <b>ID</b> | <b>Body length (mm)</b> | <b>Oesophagus length (mm)</b> | <b>Oesophagus length (%)</b> | <b>Shape of vulvar flap</b> | <b>Vulva length (mm)</b> | <b>Distance of anus from posterior end (mm)</b> |
|-----------|-------------------------|-------------------------------|------------------------------|-----------------------------|--------------------------|-------------------------------------------------|
| 16F       | 14.6                    | 1.3                           | 8.90                         | linguiform                  | 0.893                    | 0.396                                           |
| 17F       | 16.1                    | 1.4                           | 8.76                         | linguiform                  | 1.223                    | 0.443                                           |
| 18F       | 19.8                    | 1.5                           | 7.47                         | linguiform                  | 1.172                    | 0.478                                           |
| 19F       | 21.3                    | 1.4                           | 6.62                         | linguiform                  | 1.044                    | 0.424                                           |
| 20F       | 23.4                    | 1.4                           | 5.98                         | knobbed                     | 1.118                    | 0.439                                           |
| 21F       | 21.9                    | 1.4                           | 6.26                         | knobbed                     | 1.080                    | 0.416                                           |
| 22F       | 22.1                    | 1.4                           | 6.11                         | smooth                      | 1.187                    | 0.421                                           |
| 23F       | 16.7                    | 1.3                           | 7.78                         | knobbed                     | 1.282                    | 0.366                                           |
| 24F       | 18.5                    | 1.2                           | 6.65                         | knobbed                     | 0.599                    | 0.361                                           |
| 25F       | 22.7                    | 1.4                           | 5.99                         | linguiform                  | 0.939                    | 0.492                                           |
